# Supplementary material for: Characterization of Malectin/Malectin-like Receptor-like Kinase Family Members in Foxtail Millet (Setaria italica L.)
Source: MDPI journal article supplement (doi:10.3390/life13061302), 2023-05-31
Supplement: s1 [file s1]

# Characterization of Malectin/Malectin-like Receptor-like Kinase Family Members in Foxtail Millet (*Setaria italica* L.)

Xiuqing Jing <sup>1,2,\*</sup>, Ning Deng <sup>1</sup> and Abdullah Shalmani <sup>3</sup>

<sup>1</sup> Department of Biology, Taiyuan Normal University, Jinzhong 030619, China; ddd\_denny@163.com

<sup>2</sup> College of Life Science, Shanxi University, Taiyuan 030006, China

<sup>3</sup> National Key Laboratory for Crop Genetic Improvement, Huazhong Agricultural University, Wuhan 430070, China; abdullahshalamni@nwafu.edu.cn

\* Correspondence: jingxiuqing0615@163.com

## Supplemental tables

**Table S1.** Analysis of physicochemical properties of SiMRLK family proteins.

| Name            | MV         | Ip   | Charge | II    | AI    | GRAVY  | Amino Acid Comosition %                      |
|-----------------|------------|------|--------|-------|-------|--------|----------------------------------------------|
| <i>SiMRLK1</i>  | 113016.22  | 8.08 | 13.5   | 39.71 | 88.88 | -0.196 | Leu (11.6), Ser (9.9), Gly (7.9), Asn (6.7)  |
| <i>SiMRLK2</i>  | 102653.69  | 7.98 | 12.5   | 40.28 | 94.43 | -0.185 | Leu (12.1), Ser (9.2), Gly (7.3), Ile (7.3)  |
| <i>SiMRLK3</i>  | 96664.58   | 6.25 | 2      | 38.91 | 87.35 | -0.192 | Ser (9.9), Leu (9.4), Gly (7.0), Ala (6.8)   |
| <i>SiMRLK4</i>  | 92489.18   | 6.8  | 6.5    | 34.61 | 85.83 | -0.205 | Leu (9.8), Ser (8.4), Gly (8.2), Ala (7.3)   |
| <i>SiMRLK5</i>  | 118,423.60 | 8.12 | 12     | 39.51 | 92.2  | -0.115 | Leu (12.3), Ser (10.0), Gly (8.5), Ala (6.7) |
| <i>SiMRLK6</i>  | 113016.08  | 6.89 | 5.5    | 38.14 | 87.82 | -0.132 | Leu (12.0), Ser (10.4), Gly (8.4), Thr (6.9) |
| <i>SiMRLK7</i>  | 108841.77  | 8.48 | 17.5   | 35.64 | 92.83 | -0.053 | Leu (12.5), Ser (10.5), Gly (7.6), Ala (6.7) |
| <i>SiMRLK8</i>  | 113024.98  | 8.48 | 17.5   | 39.07 | 93.12 | -0.064 | Leu (12.8), Ser (9.0), Ala (7.8), Gly (7.1)  |
| <i>SiMRLK9</i>  | 97,435.12  | 5.55 | -9     | 37.81 | 82.37 | -0.162 | Leu (9.6), Ala (8.5), Ser (8.5), Gly (7.7)   |
| <i>SiMRLK10</i> | 92175.01   | 6.87 | 5      | 26.17 | 89.92 | -0.105 | Leu (10.5), Ser (9.2), Val (8.2), Gly (7.7)  |
| <i>SiMRLK11</i> | 95,058.23  | 6.15 | 1      | 33.47 | 80.13 | -0.21  | Ser (9.6), Leu (9.2), Thr (8.1), Gly (8.0)   |
| <i>SiMRLK12</i> | 94,978.74  | 5.53 | -10    | 36.59 | 81.16 | -0.174 | Ala (9.6), Leu (8.2), Ser (7.9), Val (7.8)   |
| <i>SiMRLK13</i> | 93,155.95  | 6.27 | 1      | 41.87 | 88.48 | -0.129 | Leu (11.1), Ala (9.4), Ser (9.3), Val (7.0)  |
| <i>SiMRLK14</i> | 92,969.69  | 5.86 | -3.5   | 36.82 | 88.49 | -0.011 | Ala (10.8), Leu (9.9), Ser (9.9), val (9.2)  |
| <i>SiMRLK15</i> | 112,625.60 | 6.47 | 3.5    | 35.74 | 88.88 | -0.16  | Leu (11.0), Ser (9.7), Gly (8.2), Asn (7.0)  |
| <i>SiMRLK16</i> | 97902.22   | 6.12 | -0.5   | 33.00 | 91.12 | -0.097 | Leu (12.6), Ser (11.4), Gly (8.0), Val (6.7) |
| <i>SiMRLK17</i> | 96936.85   | 5.93 | -2     | 32.83 | 93.51 | -0.105 | Leu (12.6), Ser (11.6), Gly (8.2), Asn (6.9) |
| <i>SiMRLK18</i> | 111735.65  | 7.11 | 5.5    | 30.73 | 90.42 | -0.12  | Leu (12.6), Ser (10.7), Gly (8.0), Asn (7.4) |
| <i>SiMRLK19</i> | 92167.94   | 6.34 | 2.5    | 37.69 | 90.13 | -0.137 | Leu (10.4), Ser (10.0), Val (7.2), Thr (6.8) |
| <i>SiMRLK20</i> | 92,724.08  | 7.92 | 8      | 35.65 | 90.14 | -0.07  | Leu (10.2), Ser (10.1), Ala (8.2), Ile (6.5) |
| <i>SiMRLK21</i> | 95,724.24  | 5.77 | -5     | 32.07 | 79.88 | -0.173 | Ser (9.3), Leu (8.9), Gly (8.9), Ala (8.1)   |
| <i>SiMRLK22</i> | 92484.17   | 9.06 | 18.00  | 43.18 | 84.38 | -0.098 | Ala (11.6), Leu (9.5), Ser (9.3), Gly (8.7)  |
| <i>SiMRLK23</i> | 93597.62   | 5.95 | -2     | 44.3  | 82.83 | -0.115 | Ala (10.1), Ser (9.4), Leu (9.2), Val (7.9)  |

List of abbreviation: MV: molecular weight; pI: isoelectric point; II, Instability index; AI, Aliphatic index; GRAVY: Grand average of hydropathicity, GRAVY.

**Table S2.** The conserved motif analysis of the SiMRLK family proteins in foxtail millet.

| Motifs No. | sequences                                               | E-value  | Sites | Width | Logo                                                                                |
|------------|---------------------------------------------------------|----------|-------|-------|-------------------------------------------------------------------------------------|
| 1          | WKTRLEICJGAARGLHYLHEGSSIRIIHRDVKASNI<br>LLDEBLNAKVSDFG  | 3.3e-687 | 23    | 50    |  |
| 2          | QGKREFLTEIEMJSRLRHRNLVSLIGCCDEGNEMJ<br>LVYEYMENGSLRRHL  | 3.8e-659 | 23    | 50    |  |
| 3          | KTHVSTAVAGTFGYLDPEYARRGQLTEKSDVYSF<br>GVVLLLEVLCGRPNIBP | 4.4e-646 | 22    | 50    |  |
| 4          | ARMSPSSLRYYGJGLENGNYTVKLQFAEIAFTDDQ<br>TWQSLGKRVDIYIQ   | 5.1e-252 | 10    | 50    |  |
| 5          | JGEGGFVKVYKGVLEDGTVVAVK                                 | 3.6e-246 | 23    | 23    |  |
| 6          | VDPRJGGEYSPEELLKFAEVALKCTADSPVQRPSM<br>SDVVWMLEGALZLQE  | 8.5e-374 | 23    | 50    |  |
| 7          | AVTKTYTAPVTKNFLEIHLFWAGKGTCCIPTQGY<br>YGPLISAJSVTPNFTP  | 3.4e-239 | 10    | 50    |  |
| 8          | ELGNLSKLEQLYJSSSGLSGPLSTFSKLTNLKILRA<br>SDNDFSGKIPDFJ   | 4.3e-175 | 13    | 50    |  |
| 9          | CLQRDTPCFLGSPQYSSFAVDCGSNRMSGSDNSM<br>YDPDPADLGPAHYV    | 2.2e-126 | 6     | 50    |  |
| 10         | GPIPTSLSNLTNLTSLRIGDJVGGSSSLPFJSNMTSL<br>KTLVLRNCRISGN  | 4.2e-136 | 9     | 50    |  |

**Table S3.** Primer sequences for qRT-PCR used in the study.

| <b>Gene Name</b>      | <b>Gene_Symbol</b> | <b>Primer Sequences</b>  |
|-----------------------|--------------------|--------------------------|
| SETIT_016192mg        | qSiMRLK1-F         | GTGAGGCTCTTTGGTTGTTG     |
|                       | qSiMRLK1-R         | TTCAACTGATGTTCTGAGCGA    |
| <u>SETIT_016287mg</u> | qSiMRLK3-F         | ACTGTACCTATCCTCGAGCTG    |
|                       | qSiMRLK3-R         | CATTGCTGGAGAGATCCAGGT    |
| SETIT_028810mg        | qSiMRLK7-F         | GGCCCGGATGAAGAAGTTAC     |
|                       | qSiMRLK7-R         | ACTGATAATATTAGGTAGTCAGGC |
| SETIT_021180mg        | qSiMRLK11-F        | TCCCGTTTTTCGTGCTTCGTA    |
|                       | qSiMRLK11-R        | ACTCCAGGTGACACAGCAAG     |
| SETIT_009354mg        | qSiMRLK19-F        | AAAGCTTCGGTTTTCCGTGC     |
|                       | qSiMRLK19-R        | CGTCGGTGGCGGAATTTTAC     |
| SETIT_034221mg        | qSiMRLK23-F        | AACTACCTCGTCCGTCTCCA     |
|                       | qSiMRLK23-R        | AGTCCAGGTAAAAGGCCTGC     |
| SETIT_026509mg        | qSiActin-F         | CGCATATGTGGCTCTTGACT     |
|                       | qSiActin-R         | GGGCACCTAAATCTCTCGC      |
